# Supplementary material for: Catalytic asymmetric synthesis of a nitrogen heterocycle through stereocontrolled direct photoreaction from electronically excited state
Source: PubMed Central journal article supplement (PMC5740077; doi:10.1038/s41467-017-02148-1), 2017-12-21
Supplement: 41467_2017_2148_MOESM2_ESM.pdf [file 41467_2017_2148_MOESM2_ESM.pdf]

**Editorial Note:** This manuscript has been previously reviewed at another journal that is not operating a transparent peer review scheme. The manuscript was considered suitable for publication without further review at *Nature Communications*.
