# Supplementary material for: Catalytic asymmetric synthesis of a nitrogen heterocycle through stereocontrolled direct photoreaction from electronically excited state
Source: PubMed Central journal article supplement (PMC5740077; doi:10.1038/s41467-017-02148-1), 2017-12-21
Supplement: 41467_2017_2148_MOESM3_ESM.pdf [file 41467_2017_2148_MOESM3_ESM.pdf]

## **Description of Additional Supplementary Files**

File Name: Supplementary Data 1

Description: Calculated spin densities of triplet excited states and coordinates.
